# Supplementary material for: Structure and Assembly of TP901-1 Virion Unveiled by Mutagenesis
Source: PubMed Central journal article supplement (PMC4493119; doi:10.1371/journal.pone.0131676), 2015-07-06
Supplement: pone.0131676.s001.pdf [file pone.0131676.s001.pdf]

|              |                                                                                                                       |
|--------------|-----------------------------------------------------------------------------------------------------------------------|
| MCP1-TP901-1 | MKTPDYWKREKAWQEQQIKDDTKRMKQIMDKLFEAQEAIQKEINANWQNFANGQGISIS                                                           |
| MCP1-Tuc2009 | MNSDDYWRKREKAWQEQQIKDDTKRMKQIMDKLFEAQEAIQKEINANWQNFANGQGISIS                                                          |
| gp7-3PP1     | MPEPQNQEELDKYLDN-IITQAEKRLDKVFASRLKEIKAMINKLFEKYS--KNGE-----<br>* . : . : * : : * : * : . : . : * : : : . : * :       |
| MCP1-TP901-1 | EAMKRADKMDVKAFANKAKKYVQEKDFSNQANQVLKLYNLTMRVNRLELLKANIGLELIS                                                          |
| MCP1-Tuc2009 | EAMKRADKMDVKAFENKAKKYVREKDFSHQANQVLKLYNLTMRVNRLELLKANIGLELIS                                                          |
| gp7-3PP1     | --LTYADVVKVNRLEKEMD--VIKQNISADYKTVLKMLNELLETQVVDNYLR--SAYIYE<br>. : * : . : : : . * : : * : : * : : * : : : . : . : . |
| MCP1-TP901-1 | VFDDLDKYFSNNLTSAAALTEFERQAGILGLSVKREGYNLSVESVLNGSYKVEGFASFSDK                                                         |
| MCP1-Tuc2009 | VFDDLDKYFSKMLTGAALTEFERQAGILGLSVKPKGYNLSVESVLNGSYKVEGFASFSDK                                                          |
| gp7-3PP1     | MYTGRNLGFS--VPSADVQRAVENPIPLLTLPKVLERQVLEINNIAMIAQGLMAGEG<br>: : . : * : : * : : : * * : : * : : : . : . :            |
| MCP1-TP901-1 | LWQYQFELKADIEKLLIRSVTGGINPKTLAPQLKRLMTEKGLNATYNAQRLLVSETTRI                                                           |
| MCP1-Tuc2009 | IWQYQFELKADIEKLLIRSVTGGINLALAPQLKRLMTEKGLNATYNAQRLLVSETTRI                                                            |
| gp7-3PP1     | YSQVAQRVHKRMQLSLAKARLTARTEGHRVQVAGRMSAEQAARKVNMQKMSAALDTRT<br>. * : : : * : : . . . * : : : . : . : . : * :           |
| MCP1-TP901-1 | QTAIQEESYKKADIESVEYIAEPSACPICGALNGKIFKLDMSPGINAPNMHFFCRCSTA                                                           |
| MCP1-Tuc2009 | QTAIQEESYKKADIESVEYIAEPSACPICGALNGKIFKLDMSPGINAPNMHFFCRCSTA                                                           |
| gp7-3PP1     | RAGHRKLDGKIINMD-----ENFKSIYGVGKAPGHMMAKDDCNCRCALIYVIDGEI<br>: : . : * : : . . * : . : : : . * : : . : .               |
| MCP1-TP901-1 | PHVDDKAFWDDRLKEQDKKNSGRNIPVSLKGLNDDYLNEKREE SRLKAGRVNAKKYDAQS                                                         |
| MCP1-Tuc2009 | PHVDDKGFWDLLD-----                                                                                                    |
| gp7-3PP1     | PSVRRARLSDGSTR-----<br>* * : *                                                                                        |
| MCP1-TP901-1 | ESFANVTNEASMRMRISDIGFRRAIESGNLKSSELGDDFDKGRIRIEKTLFNLPENIKR                                                           |
| MCP1-Tuc2009 | -----RKVISQDEYKQA-----                                                                                                |
| gp7-3PP1     | -----VIKYPYTEWEKQ-----<br>: * : .                                                                                     |
| MCP1-TP901-1 | SEMPKYGLSDSDDLFEKTRKHSVLGYGNIIIELDSSVRKRRTTYTVNDSLUNKRGLITSA                                                          |
| MCP1-Tuc2009 | -----FDDRTED-----                                                                                                     |
| gp7-3PP1     | -----RKAS-----<br>: : .                                                                                               |
| MCP1-TP901-1 | TPVGTRKPTYNGIKEKAIGEINSISEFLNSNKKTNRYIEAQVHGDLTFKNDVKRRIIVPDRS                                                        |
| MCP1-Tuc2009 | -----DKAIEELR-----NKRKG-----                                                                                          |
| gp7-3PP1     | -----                                                                                                                 |
| MCP1-TP901-1 | YLDKLSKEFEQLKNMGIEVLVAPK                                                                                              |
| MCP1-Tuc2009 | -----                                                                                                                 |
| gp7-3PP1     | -----                                                                                                                 |
