# Supplementary material for: Structure and Assembly of TP901-1 Virion Unveiled by Mutagenesis
Source: PubMed Central journal article supplement (PMC4493119; doi:10.1371/journal.pone.0131676), 2015-07-06
Supplement: pone.0131676.s003.pdf [file pone.0131676.s003.pdf]

| Strains, phages and plasmids                               | Relevant features                                                                                                                           | Source       |
|------------------------------------------------------------|---------------------------------------------------------------------------------------------------------------------------------------------|--------------|
| <b><i>L. lactis</i></b>                                    |                                                                                                                                             |              |
| NZ9000                                                     | MG1363 <i>pepN::nisRK</i>                                                                                                                   | (51)         |
| NZ9000-Cro <sub>712</sub>                                  | NZ9000 with point mutations inserting a BamHI site into prophage t712 anti-repressor (Cro) promoter sequence; contains plasmid pJP005       | This study   |
| NZ9000-Cro <sub>712</sub> -TP901-1erm                      | NZ9000-Cro <sub>712</sub> displaying t712 phenotype lysogenized with TP901-1erm prophage; contains plasmid pJP005                           | This study   |
| 901-1                                                      | Lysogenic host and source of TP901-1 prophage                                                                                               | (13)         |
| 3107                                                       | Lytic host for phage TP901-1erm                                                                                                             | (23)         |
| UC509                                                      | Lysogenic host and source of Tuc2009 prophage                                                                                               | (5)          |
| UC509.9                                                    | Lytic host for phage Tuc2009                                                                                                                | (1, 25)      |
| NZ9700                                                     | Nisin over-producing strain                                                                                                                 | (50)         |
| NZ9000-Cro <sub>712</sub> -Portal <sub>TP901-1</sub> ::Ter | Translation termination codon insertion in TP901-1erm portal protein (ORF32)                                                                | This study   |
| NZ9000-Cro <sub>712</sub> -MCP1 <sub>TP901-1</sub> ::Ter   | Translation termination codon insertion in TP901-1erm MCP1 (ORF33)                                                                          | This study   |
| NZ9000-Cro <sub>712</sub> -MCP2 <sub>TP901-1</sub> ::Ter   | Translation termination codon insertion in TP901-1erm MCP2 (ORF34)                                                                          | This study   |
| NZ9000-Cro <sub>712</sub> -Sfp <sub>TP901-1</sub> ::Ter    | Translation termination codon insertion in TP901-1erm Sfp (ORF35)                                                                           | This study   |
| NZ9000-Cro <sub>712</sub> -MHP <sub>TP901-1</sub> ::Ter    | Translation termination codon insertion in TP901-1erm MHP (ORF36)                                                                           | This study   |
| NZ9000-Cro <sub>712</sub> -MCP3 <sub>TP901-1</sub> ::Ter   | Translation termination codon insertion in TP901-1erm MCP3 (ORF37)                                                                          | This study   |
| NZ9000-Cro <sub>712</sub> -HTC1 <sub>TP901-1</sub> ::Ter   | Translation termination codon insertion in TP901-1erm HTC1 (ORF38)                                                                          | This study   |
| NZ9000-Cro <sub>712</sub> -HTC2 <sub>TP901-1</sub> ::Ter   | Translation termination codon insertion in TP901-1erm HTC2 (ORF39)                                                                          | This study   |
| NZ9000-Cro <sub>712</sub> -Tap <sub>TP901-1</sub> ::Ter    | Translation termination codon insertion in TP901-1erm Tap (ORF40)                                                                           | This study   |
| NZ9000-Cro <sub>712</sub> -Ttp <sub>TP901-1</sub> ::Ter    | Translation termination codon insertion in TP901-1erm Ttp (ORF41)                                                                           | This study   |
| NZ9000-Cro <sub>712</sub> -MTP <sub>TP901-1</sub> ::Ter    | Translation termination codon insertion in TP901-1erm MTP (ORF42)                                                                           | This study   |
| NZ9000-Cro <sub>712</sub> -gpG <sub>TP901-1</sub> ::Ter    | Translation termination codon insertion in TP901-1erm gpG (ORF43)                                                                           | This study   |
| NZ9000-Cro <sub>712</sub> -gpT <sub>TP901-1</sub> ::BamHI  | Insertion mutation in TP901-1erm gpG (ORF43) disrupting gpT (ORF44) production                                                              | This study   |
| NZ9000-Cro <sub>712</sub> -gpGfsT <sub>TP901-1</sub>       | Insertion and nucleotide altering mutation in TP901-1erm gpG (ORF43) causing a frameshift and permanently fusing it in frame to gpT (ORF44) | This study   |
| <b>Phages</b>                                              |                                                                                                                                             |              |
| TP901-1erm                                                 | Temperate P335 species phage infecting 3107; contains erythromycin marker                                                                   | (13, 48, 94) |
| Tuc2009                                                    | Temperate P335 species phage infecting UC509.9                                                                                              | (25)         |
| <b>Plasmids</b>                                            |                                                                                                                                             |              |
| pNZ8048                                                    | Nisin-inducible protein expression vector                                                                                                   | (27)         |
| pTX8049                                                    | pNZ8048 derivative expression vector; recombinant N-terminal thioredoxin fusion                                                             | (31)         |
| pJP005                                                     | pNZ8048 derivative expressing RecT protein required for recombineering mutagenesis                                                          | (86)         |
| pNZ8048-Portal <sub>Tuc2009</sub>                          | Tuc2009 Portal protein (ORF33) expression construct; Genbank coordinates 16486-17847                                                        | This study   |
| pNZ8048-MCP1 <sub>Tuc2009</sub>                            | Tuc2009 MCP1 (ORF34) expression construct; Genbank coordinates 17844..18884                                                                 | This study   |
| pTX8049-MCP2 <sub>Tuc2009</sub>                            | Tuc2009 MCP2 (ORF35) expression construct; Genbank coordinates 18930..19262                                                                 | This study   |
| pNZ8048-Sfp <sub>Tuc2009</sub>                             | Tuc2009 Sfp (ORF36) expression construct; Genbank coordinates 19388..20050                                                                  | This study   |
| pTX8049-MHP <sub>Tuc2009</sub>                             | Tuc2009 MHP (ORF37-39) expression construct; Genbank coordinates 20052..22183                                                               | This study   |
| pTX8049-MCP3 <sub>Tuc2009</sub>                            | Tuc2009 MCP3 (ORF40) expression construct; Genbank coordinates 22183..22383                                                                 | This study   |
| pTX8049-HTC1 <sub>Tuc2009</sub>                            | Tuc2009 HTC1 (ORF41) expression construct; Genbank coordinates 22367..22699                                                                 | This study   |
| pTX8049-Tap <sub>Tuc2009</sub>                             | Tuc2009 Tap (ORF43) expression construct; Genbank coordinates 23004..23330                                                                  | This study   |
