# Supplementary material for: Structure and Assembly of TP901-1 Virion Unveiled by Mutagenesis
Source: PubMed Central journal article supplement (PMC4493119; doi:10.1371/journal.pone.0131676), 2015-07-06
Supplement: pone.0131676.s004.pdf [file pone.0131676.s004.pdf]

| Mutant strain and phages                                                     | Accession numbers, ORF numbers and genomic coordinates of mutation region | Original DNA sequence             | Original protein sequence <sup>1,2</sup> | DNA sequence following recombineering <sup>3</sup>   | Protein sequence following recombineering |
|------------------------------------------------------------------------------|---------------------------------------------------------------------------|-----------------------------------|------------------------------------------|------------------------------------------------------|-------------------------------------------|
| <i>L. lactis</i> NZ9000<br>NZ9000-Cro <sub>712</sub>                         | NC_017949<br>782805..782833                                               | TTGACAAGTTGCAACGA<br>CGATGTTATAAT | N/A                                      | TTGACAAGTTGCAACGA<br>CGAT <u>CAGGATCC</u>            | N/A                                       |
| <b>TP901-1</b><br>NZ9000-Cro <sub>712</sub> -Portal <sub>TP901-1</sub> ::Ter | NC_002747<br>ORF32; 15816..15839                                          | AAACAAGAGCCTTTTATT<br>TGCCGTG     | KQEPLFAV                                 | AAACAAGAGCCTT <u>GAA</u><br><u>TTCT</u> ATTTGCCGTG   | KQEP*ILFAV                                |
| NZ9000-Cro <sub>712</sub> -MCP1 <sub>TP901-1</sub> ::Ter                     | ORF33; 17151..17174                                                       | GGAATTCCTGGTTAAG<br>CGTTCCA       | GILGLSVP                                 | GGAATTCCTGGTT <u>GAA</u><br><u>TC</u> ATAAGCGTTCCA   | GILG*IHKRS                                |
| NZ9000-Cro <sub>712</sub> -MCP2 <sub>TP901-1</sub> ::Ter                     | ORF34; 18500..18523                                                       | TATCATTACTATTTTGA<br>CGGTGAT      | YHYYFDGD                                 | TATCATTACTATT <u>GAA</u><br><u>TC</u> ATTGACGGTGAT   | YHYY*IH*R*                                |
| NZ9000-Cro <sub>712</sub> -Sfp <sub>TP901-1</sub> ::Ter                      | ORF35; 19028..19051                                                       | GTTAAAGAAAAATCTG<br>ACGAAGAA      | VKEKSDEE                                 | GTTAAAGAAAAAT <u>GAA</u><br><u>TTCT</u> CGACGAAGAA   | VKEK*IPDEE                                |
| NZ9000-Cro <sub>712</sub> -MHP <sub>TP901-1</sub> ::Ter                      | ORF36; 19812..19835                                                       | GCTAAGACTACCTCTCA<br>AACTGTT      | AKTTSQTV                                 | GCTAAGACTACCT <u>GAA</u><br><u>TC</u> GCTCAAACCTGTT  | AKTT*IRSNC                                |
| NZ9000-Cro <sub>712</sub> -MCP3 <sub>TP901-1</sub> ::Ter                     | ORF37; 20318..20341                                                       | GATGAACCTAACGACGCT<br>TACCGTT     | DELTLTV                                  | GATGAACCTAACG <u>TGAA</u><br><u>TC</u> ACGCTTACCGTT  | DELT*IHAYR                                |
| NZ9000-Cro <sub>712</sub> -HTC1 <sub>TP901-1</sub> ::Ter                     | ORF38; 20526..20549                                                       | CTTATTCTTGGTTCTGA<br>CATTAAA      | LILGSDIK                                 | CTTATTCTTGGTT <u>GAA</u><br><u>TC</u> CCTGACATTTAAA  | LILG*IPDIK                                |
| NZ9000-Cro <sub>712</sub> -HTC2 <sub>TP901-1</sub> ::Ter                     | ORF39; 20900..20923                                                       | AGTGTAGAAGTTTTTGG<br>AGATATT      | SVEVFGDI                                 | AGTGTAGAAGTTTT <u>AGAA</u><br><u>TTCT</u> TGGAGATATT | SVEV*NSWRV                                |
| NZ9000-Cro <sub>712</sub> -Tap <sub>TP901-1</sub> ::Ter                      | ORF40; 21107..21130                                                       | CTTGTAAGCATTGGGA<br>TAAAGCA       | LVKHLDKA                                 | CTTGTAAGCATT <u>GAA</u><br><u>TC</u> TGGATAAAGCA     | LVKH*ILDKA                                |
| NZ9000-Cro <sub>712</sub> -Ttp <sub>TP901-1</sub> ::Ter                      | ORF41; 21444..21467                                                       | TTCAAACGAATCCAAGC<br>TTGGGG       | FKRIQALG                                 | TTCAAACGATGATGAGC<br>TTGGGG                          | FKR**ALG                                  |
| NZ9000-Cro <sub>712</sub> -MTP <sub>TP901-1</sub> ::Ter                      | ORF42; 22061..22084                                                       | ATGCAGCAATTATTGAA<br>GTGTGGG      | MQQLKCG                                  | ATGCAGCAATTAT <u>GAA</u><br><u>TC</u> ATGAAGTGTGGG   | MQQL*IHEVW                                |
| NZ9000-Cro <sub>712</sub> -gpG <sub>TP901-1</sub> ::Ter                      | ORF43; 22579..22602                                                       | AACATTGCAACTTTATC<br>GAATGTA      | NIATLSNV                                 | AACATTGCAACT <u>GAA</u><br><u>TC</u> TATCGAATGTA     | NIAT*ILSNV                                |
| NZ9000-Cro <sub>712</sub> -gpT <sub>TP901-1</sub> ::BamHI                    | ORF44; 22731..22737                                                       | GAAAGCAATACGGGAA<br>AGTTAATC      | ESNTGKLI..[6 aa].*                       | GAAAGCAATACG <u>GGAT</u><br><u>CC</u> GGAAAAGTTAATC  | ESNTGSGKLI..[6 aa].*                      |
| NZ9000-Cro <sub>712</sub> -gpGfsT <sub>TP901-1</sub>                         | ORF43-44; 22731..22737                                                    | GAAAGCAATACGGGAA<br>AGTTAATC      | ESNTGKLI..[6 aa].*                       | GAAAGCAATAC <u>TGGTA</u><br><u>AGCTGATC</u>          | ESNTGKVN..[126 aa].*                      |

1 The original protein sequence of NZ9000-Cro<sub>712</sub>-gpT<sub>TP901-1</sub>::Ter mutant shows only the amino acid sequence of gpG. Protein sequence of gpGT (produced through a -1 frame-shift in *gpG* DNA sequence GGGAAAG, fusing it to *gpT*) is not shown.

2 The original protein sequence of NZ9000-Cro<sub>712</sub>-gpGfsT<sub>TP901-1</sub> mutant shows only the amino acid sequence of gpG.

3 Introduced DNA bases causing mutations are underlined once, while introduced bases resulting in a novel restriction site are double underlined.

N/A Not applicable

\* Translation terminating stop codon
