# Supplementary material for: Structure and Assembly of TP901-1 Virion Unveiled by Mutagenesis
Source: PubMed Central journal article supplement (PMC4493119; doi:10.1371/journal.pone.0131676), 2015-07-06
Supplement: pone.0131676.s005.pdf [file pone.0131676.s005.pdf]

| Oligonucleotide name                      | Oligonucleotide sequence (5' → 3')                                                                   |
|-------------------------------------------|------------------------------------------------------------------------------------------------------|
| <b>Recombineering primers<sup>w</sup></b> |                                                                                                      |
| NZ9000-Cro <sub>712</sub> ::BamHI         | C*T*C*C*A*TGATTGTTTCGCTTGTTGACTTTATGAGTTA <u>GGATCCTG</u> ATCGTCGTTGCAACTTGTCAACCATTAAGGTTGTTTT      |
| Portal <sub>TP901-1</sub> ::Ter           | T*T*T*T*T*GTCCTCGTCAACACCATATCTCACGGCAAAT <u>AGAATTC</u> AAGGCTCTTGTTGACTGTATCGTCATAGACCATAAAA       |
| MCP1 <sub>TP901-1</sub> ::Ter             | T*C*A*A*C*TAAACTGTTATATCCTTCCTTTGGAACGCTTAT <u>GAATTC</u> AACCAAGAATTCGGCTTGCTTTCAAATTCGTGAG         |
| MCP2 <sub>TP901-1</sub> ::Ter             | G*C*T*A*T*AATTTCTTCAACAACATTTCTATCACCGTCAAT <u>GAATTC</u> AATAGTAATGATAGAATTTATTTCTTTTTAAAGATGA      |
| Sfp <sub>TP901-1</sub> ::Ter              | T*T*A*G*C*T*TTTTGAAGTTCGGCAGCTTTTTCTCGTCAG <u>GAATTC</u> ATTTTTCTTTAACTGACTTTTTGCCACCTTTTTCAAG       |
| MHP <sub>TP901-1</sub> ::Ter              | C*C*C*C*G*TCAACGTTTGCTTTAGTAGAAACAGTTTGAG <u>CGAATTC</u> AGGTAAGTCTTAGCTGCGCTCAATAAGTCGTCATCGA       |
| MCP3 <sub>TP901-1</sub> ::Ter             | T*A*G*T*T*TCAAGAAGCTCTTTAGCTGATTAACGGTAAGCGT <u>GAATTC</u> ACGTTAGTTCATCATTTTTACCTTGCTTGGTCGCATTTATG |
| HTC1 <sub>TP901-1</sub> ::Ter             | A*C*A*T*A*TTCTAGTTCGTGGCGTACTTCTTTAATGTCAAG <u>GAATTC</u> AACCAAGAATAAGCAATAAACGGTCAAGAGTGCCTTT      |
| HTC2 <sub>TP901-1</sub> ::Ter             | T*C*A*T*T*CGCATGACTTTTGCCCTTTTTAATATCTCCAAA <u>GAATTC</u> AACTTCTACACTTCTGTCAAGTTCGAATATCAGTGATATT   |
| Tap <sub>TP901-1</sub> ::Ter              | G*T*T*C*A*ACACCTTTAAAGATGCTGCTTTATCC <u>GAATTC</u> AAATGCTTTACAAGTTGGTCAATCCCTTTAAAGATAAGCTA         |
| Ttp <sub>TP901-1</sub> ::Ter              | T*C*A*T*T*GGCTTATAATCATAAACGGTATACCCAAAGCT <u>CATC</u> ATCGTTTGAACAATTCGTCAAAAATAGATTGGTCTCGAG       |
| MTP <sub>TP901-1</sub> ::Ter              | A*C*T*T*G*CTTTTCTGCTTTATCAATTTCCACACTTCA <u>TGAATTC</u> CATAATTGCTGCATCATCAAACGCTTTGTCCATTTTCGT      |
| gpT <sub>TP901-1</sub> ::Ter              | G*T*T*T*C*TGTTTCGATTTTCTAAAAATAATACATTCGAT <u>AGAATTC</u> AAGTTGCAATGTTAGCCATTTCTAGTTCAGGAATGAT      |
| gpT <sub>TP901-1</sub> ::BamHI            | T*C*A*G*C*TATTTGGTCATTTTGGCTTTGATTAACCTTTCC <u>GGATCC</u> CGTATTGCTTTCAGTAATTTCTTTCAAAACATCATCA      |
| gpGf <sub>5</sub> T <sub>TP901-1</sub>    | C*A*A*A*C*TTTTTCAGCTATTTGGTCAATTTTGGCTTTGATC <u>CAGCTT</u> ACCAAGTATTGCTTTCAGTAATTTCTTTCAAAACATCATCA |
| <b>Screening primers<sup>x</sup></b>      |                                                                                                      |
| Cro- <i>l</i> 712-Fw                      | CTTCAAGATATTCATCGCTCAGACGG                                                                           |
| Cro- <i>l</i> 712-MidFw                   | TTGCAACGACGATCAGGATCC                                                                                |
| Cro- <i>l</i> 712-Rv                      | TCGTAATCATCAAGCGCATGTTCC                                                                             |
| Scrnseq-Portal-Fw                         | GCAATGACAACCTTATCAGCGTGA                                                                             |
| Scrn-Portal -MidRv                        | CACCATATCTCACGGCAAATAGAATTC                                                                          |
| Seq-Portal -Rv                            | ACTGGTAAATCTGGATATGGGTTG                                                                             |
| Scrnseq-MCP1-Fw                           | GAGAAAGCTTGGCAAGAGCA                                                                                 |
| Scrn-MCP1-MidRv                           | CTTCCTTTGGAACGCTTATGAATTC                                                                            |
| Seq-MCP1-Rv                               | ATGCATGTTTGGTGCATTAATACCA                                                                            |
| Scrnseq-MCP2-Fw                           | CATTCAGTTTTAGGTTATGGGAACAT                                                                           |
| Scrn-MCP2-MidRv                           | AACATTTCTATCACCGTCAATGAATTC                                                                          |
| Seq-MCP2-Rv                               | TTCAGCCTGCTCTTACCAA                                                                                  |
| Scrnseq-Sfp-Fw                            | GACGTGAAGAGAATCATTGTACCAGA                                                                           |
| Scrn-Sfp-MidRv                            | GCAGCTTTTTCTTCGTCAGGAATTC                                                                            |
| Seq-Sfp-Rv                                | TTCATCAGCTTGACTGGTAATGT                                                                              |
| Scrnseq-MHP-Fw                            | GAATTGGTAAAGAGCAGGCTGA                                                                               |
| Scrn-MHP-MidFw                            | GCTTTAGTAGAAACAGTTTGGGAATTCG                                                                         |
| Seq-MHP-Rv                                | GGCTTGTGCATCCTCATCAT                                                                                 |
| Scrnseq-MCP3-Fw                           | ACTGTTTCTACTAAAGCAAACGTTG                                                                            |
| Scrn-MCP3-MidRv                           | TGATTAACGGTAAGCGTGAATTC                                                                              |

|                   |                                      |
|-------------------|--------------------------------------|
| Seq-MCP3-Rv       | AACAGTTCTGGTAGGCTCCTT                |
| Scrnseq-HTC1-Fw   | ACGGAACTTACGCTGATGT                  |
| Scrn-HTC1-MidRv   | CGGTACTTCTTTAATGTCAGGAATTC           |
| Seq-HTC1-Rv       | CTTCTTGTGAGTAGGACTGCAT               |
| Scrnseq-HTC2-Fw   | TTGCTTATGGCTATCACTGATGA              |
| Scrn-HTC2-MidRv   | CCCTTTTTTAATATCTCCAAA <u>GAAATTC</u> |
| Seq-HTC2-Rv       | GGATTCGTTTGAACAATTCGTCA              |
| Scrnseq-Tap-Fw    | GTAATCGAAAAACGCACTCGTG               |
| Scrn-Tap-MidRv    | CTTTAAAGATGCTGCTTTATCCAGAAATTC       |
| Seq-Tap-Rv        | ACAAAAGGTTGAGCAGATTGA                |
| Scrnseq-Ttp-Fw    | TGATTTAGGCGAATGGGTTGA                |
| Scrn-Ttp-MidRv    | GGTATACCCCAAAGCTCATCA                |
| Seq-Ttp-Rv        | TGTATTTGTTGTTGTATCGTCCA              |
| Scrnseq-MTP-Fw    | CACCTCAAATATGACAGCGAATATGCAG         |
| Scrn-MTP-MidFw    | TTGATGATGCAGCAATTATGAATTC            |
| Seq-MTP-Rv        | CAATGTTAGCCATTCTAGTTCAGGA            |
| Scrnseq-gpG-Fw    | GGAAACTTGCATTCCAAACAGA               |
| Scrn-gpG-MidRv    | CGATTTCCATAAAAAATAATACATTCGATAGAATTC |
| Seq-gpG-Rv        | TTCGCATTCAATAAAAATCATCAA             |
| Scrnseq-gpT-Fw    | TCTCTTATGAACCTAACTCAGAAGATGCG        |
| Scrn-gpT-MidRv    | CATTTTTGCTTTGATTAACCTTCCGGATCC       |
| Seq-gpT-Rv        | AAGTTTTGAACCTGTTTAGCAGCGTC           |
| Scrnseq-gpGfsT-Fw | ACTTGCTGTTAAAATCATTCCCTGAACT         |
| Scrn-gpGfsT-MidRv | ACTGAAAGCAATACTGGTAAAGCTG            |
| Seq-gpGfsT-Rv     | TTCTCTGGGCTTTCGATTCTTA               |

**Recombinant protein primers<sup>1, #</sup>**

|                  |                                                                  |
|------------------|------------------------------------------------------------------|
| pNZ-PortalTuc-Fw | AGCAGCC <u>CCATGGT</u> GAAATTTGAAACCAATAAA                       |
| pNZ-PotalTuc-Rv  | AGCAGC <u>ACTAGT</u> TTAATGGTGATGGTGATGGTGCCCCCTCATTTGTTTCATTCTC |
| pNZ-MCP1Tuc-Fw   | AGCAGCC <u>CCATGG</u> ATTCATCTGATTACTGGAG                        |
| pNZ-MCP1Tuc-Rv   | AGCAGC <u>ACTAGT</u> TTAGTGATGGTGATGGTGATGCCTTTTCTTTTATTGC       |
| pTX-MCP2Tuc-Fw   | AGCAGC <u>GGATCC</u> ATGGCTAAAGATGATTCTT                         |
| pTX-MCP2Tuc-Rv   | AGCAGC <u>ACTAGT</u> TTAGTGATGGTGATGGTGATGAGTTCCTGGTATCCAGTCTTTT |
| pNZ-SfpTuc-Fw    | AGCAGC <u>CCATGGA</u> ACAAACAGAACTTTT                            |
| pNZ-SfpTuc-Rv    | AGCAGC <u>ACTAGT</u> TTAGTGATGGTGATGGTGATGATAGCCTCCTGTAAATTTT    |
| pTX-MHPTuc-Fw    | AGCAGC <u>CCATGG</u> CAAAAACAAAAACAACACTTAC                      |
| pTX-MHPTuc-Rv    | AGCAGC <u>ACTAGT</u> TTAGTGATGGTGATGGTGATGTACACCCGTAATGTGATATTA  |
| pTX-MCP3Tuc-Fw   | AGCAGC <u>GGATCC</u> ATGGGGCGGCTACTAAGTCG                        |
| pTX-MCP3Tuc-Rv   | AGCAGC <u>ACTAGT</u> TTAGTGATGGTGATGGTGATGTAAGTGATGCCATAAGCAA    |

|                |                                                                              |
|----------------|------------------------------------------------------------------------------|
| pTX-HTC1Tuc-Fw | AGCAGC <u>GGATCC</u> ATGGCTATCACTTATGAAAT                                    |
| pTX-HTC1Tuc-Rv | AGCAGC <u>ACTAGT</u> TTAGTGATGGT <b>GATGGT</b> GATGATACAATCTGAACCTCCCTATCTTC |
| pTX-TapTuc-Fw  | AGCAGC <u>GGATCC</u> ATGAAAATAACTGGAATTGA                                    |
| pTX-TapTuc-Rv  | AGCAGC <u>ACTAGT</u> TTAGTGATGGT <b>GATGGT</b> GATGTTTCGTCAACCTTTCTAA        |

---

- \* Phosphorothioate linkages of recombineering oligos.
- ψ Nucleotides of recombineering oligos which are designed to introduce or alter the base sequence of TP901-1*erm* are underlined once, while introduced restriction enzyme sites are double underlined.
- ¥ Nucleotides of screening oligos which bind to mutated bases are underlined.
- ‡ Restriction enzymes sites of recombinant protein construct oligos are double underlined.
- # Hexahistidine tags are indicated in bold.
