# Supplementary material for: Structure and Assembly of TP901-1 Virion Unveiled by Mutagenesis
Source: PLoS One. 2015 Jul 6;10(7):e0131676. doi: 10.1371/journal.pone.0131676 (PMC4493119; doi:10.1371/journal.pone.0131676)
Supplement: S2 Fig — SfpTP901-1, SfpTuc2009, gpNu3λ and gp11SPP1 are all predicted as largely α-helical in structure (PSIPRED) and contain large regions of intrinsically disordered protein structure (IUPRED). (PDF) [file pone.0131676.s002.pdf]

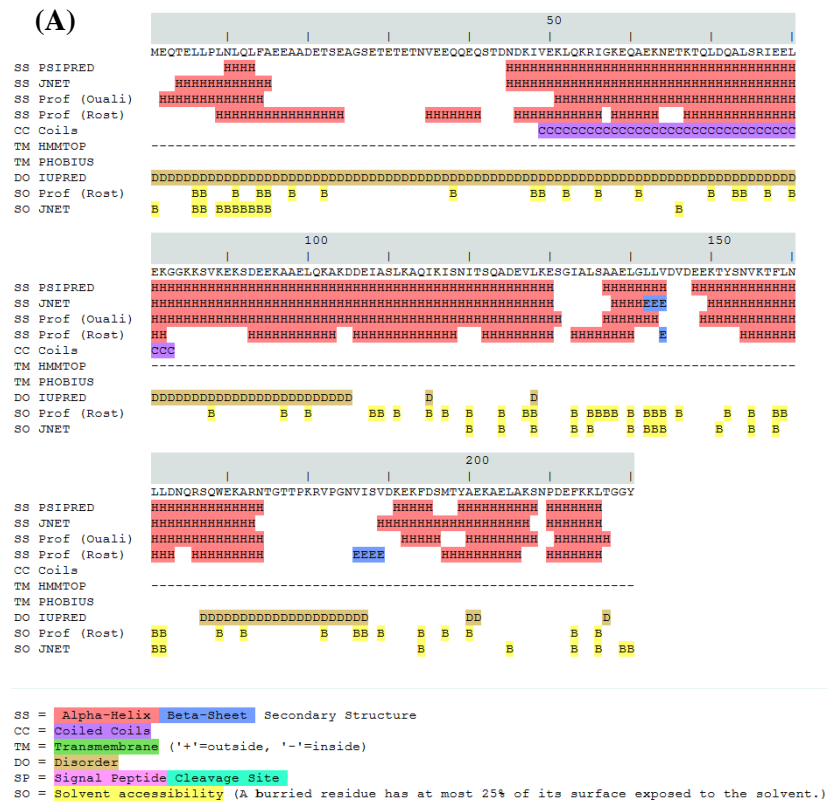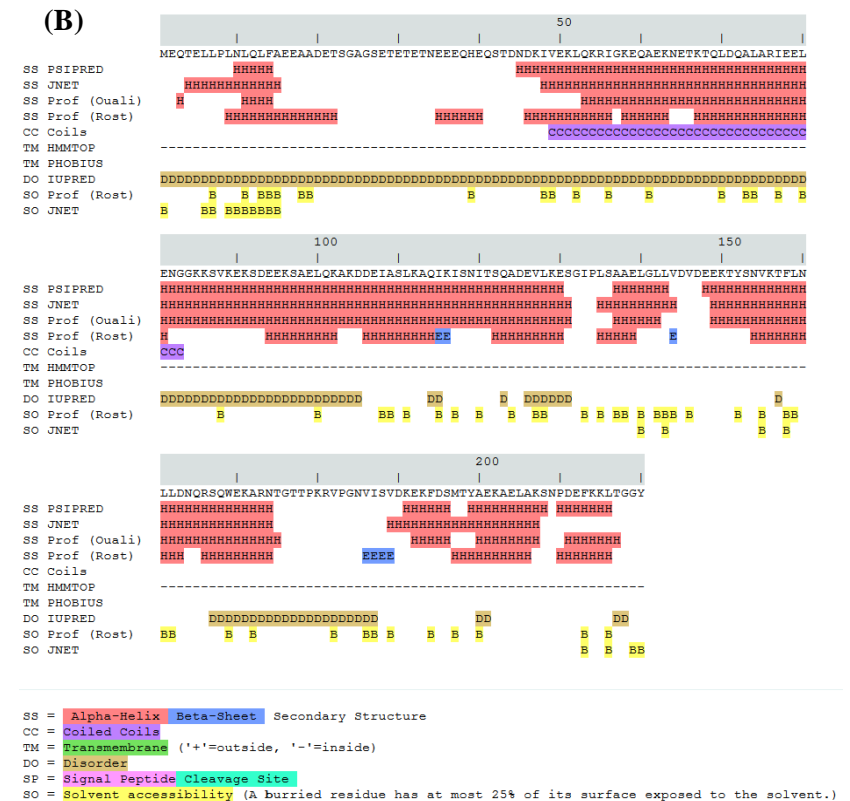

(C)

100 150

MDATROMFACKVSYATGLSVQVLDTEAANYSGOEADLAGLDELVNSTDAITVMRDALDARKSRLSGGMMFKETQSTTV

SS PSIPRED  
SS JNET  
SS Prof (Quali)  
SS Prof (Rost)  
CC Coils  
TM HMMTOP  
TM PHOBIUS  
DO IUPRED  
SO Prof (Rost)  
SO JNET

100 150

SATASQADVTDVVPATEGENASAAQPDVNAQITAAVAEENSIRIMGILNCEAHGREEQARVLAEPTGMTKVTARRILAAA

SS PSIPRED  
SS JNET  
SS Prof (Quali)  
SS Prof (Rost)  
CC Coils  
TM HMMTOP  
TM PHOBIUS  
DO IUPRED  
SO Prof (Rost)  
SO JNET

100 150

PQSAQARSDTALDRMQGAPAPLAAGNPASDAVNDLLNFTV

SS PSIPRED  
SS JNET  
SS Prof (Quali)  
SS Prof (Rost)  
CC Coils  
TM HMMTOP  
TM PHOBIUS  
DO IUPRED  
SO Prof (Rost)  
SO JNET

SS = Alpha-Helix Beta-Sheet Secondary Structure  
CC = Coiled Coils  
TM = Transmembrane ('+'=outside, '-'=inside)  
DO = Disorder  
SP = Signal Peptide Cleavage Site  
SO = Solvent accessibility (A buried residue has at most 25% of its surface exposed to the solvent.)

(D)

50

MSLKEQLGEELYGQVLAKLGEAKLVDI9DGSGFIPEKFAVDNNEKKSLLEQQLTDRDQQLSTKATGHDELAKIADL

SS PSIPRED  
SS JNET  
SS Prof (Ouali)  
SS Prof (Roost)  
CC Coils  
TM HMMTOP  
TM PHOBIUS  
DO IUFRD  
SO Prof (Roost)  
SO JNET

100 150

GKANEEARQAFAPKQQLKYEHALETALRDSGAKNFKAVKALLDTESIKLGDGKLLGFEDQIKALKEQEDYLFKGTPEFG

SS PSIPRED  
SS JNET  
SS Prof (Ouali)  
SS Prof (Roost)  
CC Coils  
TM HMMTOP  
TM PHOBIUS  
DO IUFRD  
SO Prof (Roost)  
SO JNET

200

GVQGTPTPPGKADLGLPTKKNPFKQGFDPNLTEQGIIFRNPELAKKLAQAEQ

SS PSIPRED  
SS JNET  
SS Prof (Ouali)  
SS Prof (Roost)  
CC Coils  
TM HMMTOP  
TM PHOBIUS  
DO IUFRD  
SO Prof (Roost)  
SO JNET

SS = Alpha-Helix Beta-Sheet Secondary Structure  
CC = Coiled Coils  
TM = Transmembrane ('+'=outside, '-'=inside)  
DO = Disorder  
SP = Signal Peptide Cleavage Site  
SA = Solvent accessibility (A buried residue has at most 25% of its surface exposed to the solvent.)
